# Supplementary material for: Clinical Relevance of Torque Teno Virus (TTV) in HIV/HCV Coinfected and HCV Monoinfected Patients Treated with Direct-Acting Antiviral Therapy
Source: MDPI journal article supplement (doi:10.3390/jcm10102092), 2021-05-13
Supplement: s1 [file s1]

**Table S1: TTV strains included in phylogenetic analysis**

| acc. number | Isolate     | genogroup          | country  |
|-------------|-------------|--------------------|----------|
| AF122916    | JA1         | Alpha1             | USA      |
| AF122918    | JA2B        | Alpha1             | USA      |
| AF122920    | US35        | Alpha1             | USA      |
| AF122921    | US32        | Alpha1             | USA      |
| AJ620213    | tth10       | Alpha2             | Germany  |
| AJ620215    | tth18       | Alpha2             | Germany  |
| AJ620216    | tth20       | Alpha2             | Germany  |
| AJ620217    | tth21       | Alpha2             | Germany  |
| AY823988    | 2h          | Alpha3             | Brazil   |
| FR751476    | TTV-HD16a   | Alpha3             | Germany  |
| FR751477    | TTV-HD16c   | Alpha3             | Germany  |
| FR751478    | TTV-HD16b   | Alpha3             | Germany  |
| AB050448    | TYM9        | Alpha3             | Japan    |
| AB064599    | JT03F       | Alpha4             | Japan    |
| AB064600    | JT05F       | Alpha4             | Japan    |
| AB064601    | JT14F       | Alpha4             | Japan    |
| AB064602    | JT19F       | Alpha4             | Japan    |
| AB064603    | JT41F       | Alpha4             | Japan    |
| AB064604    | CT39F       | Alpha5             | Japan    |
| AB064605    | CT44F       | Alpha5             | Japan    |
| AB064606    | JT33F       | Alpha5             | Japan    |
| AB064607    | JT34F       | Alpha5             | Japan    |
| AB026929    | TLMV-CBD203 | Betatorquetovirus  | n.d      |
| AB290917    | MD1-032     | Gammatorquetovirus | Japan    |
| KU295003    | TTVH1UY     | n.d                | Uruguay  |
| KU295004    | TTVH2UY     | n.d                | Uruguay  |
| KU295005    | TTVH3UY     | n.d                | Uruguay  |
| KU295006    | TTVH4UY     | n.d                | Uruguay  |
| KU295007    | TTVH5UY     | n.d                | Uruguay  |
| KU295008    | TTVH6UY     | n.d                | Uruguay  |
| KU295009    | TTVH7UY     | n.d                | Uruguay  |
| KU295010    | TTVH8UY     | n.d                | Uruguay  |
| KU295011    | TTVH9UY     | n.d                | Uruguay  |
| KU295012    | TTVH10UY    | n.d                | Uruguay  |
| KU295013    | TTVH11UY    | n.d                | Uruguay  |
| KU295014    | TTVH12UY    | n.d                | Uruguay  |
| KU295015    | TTVH13UY    | n.d                | Uruguay  |
| KU295016    | TTVH14UY    | n.d                | Uruguay  |
| KU295017    | TTVH15UY    | n.d                | Uruguay  |
| LN809946    | RO-SIod     | n.d                | Romania  |
| LN809950    | RO-od18     | n.d                | Romania  |
| LN809955    | RO-SVod     | n.d                | Romania  |
| KT163879    | P3          | n.d                | USA      |
| MK848842    | TTVMY HC19  | n.d                | Malaysia |
| LR742509    | RO/S-TR-7   | n.d                | Romania  |

n.d., genogroup not reported

Table S2. GenBank accession numbers of patients sequences described in Phylogenetic tree

| <b>GenBank acc.<br/>number</b> | <b>Patient code</b> | <b>country</b> |
|--------------------------------|---------------------|----------------|
| MW495822                       | INMI_PtACC          | Italy          |
| MW524862                       | INMI_PtMASY         | Italy          |
| MW524863                       | INMI_PtCARP         | Italy          |
| MW535245                       | INMI_PtFUNM         | Italy          |
| MW535246                       | INMI_PtMACF         | Italy          |
| MW535247                       | INMI_PtMAGS         | Italy          |
| MW535248                       | INMI_PtMEDH         | Italy          |
| MW535249                       | INMI_PtNACL         | Italy          |
| MW535250                       | INMI_PtPADX         | Italy          |
| MW535251                       | INMI_PtPISZ         | Italy          |
| MW535252                       | INMI_PtRIZR         | Italy          |
| MW535253                       | INMI_PtAMAG         | Italy          |
| MW535254                       | INMI_PtBACY         | Italy          |
| MW535255                       | INMI_PtBARV         | Italy          |
| MW535256                       | INMI_PtBIOT         | Italy          |
| MW550303                       | INMI_PtCOEW         | Italy          |
| MW550304                       | INMI_PtDIGI         | Italy          |
| MW550305                       | INMI_PtGIUX         | Italy          |
| MW550306                       | INMI_PtMARO         | Italy          |
| MW570506                       | INMI_PtMARC         | Italy          |
| MW570507                       | INMI_PtANOY         | Italy          |
| MW570508                       | INMI_PtBIAI         | Italy          |
| MW570509                       | INMI_PtCANO         | Italy          |
| MW570510                       | INMI_PtCERK         | Italy          |
| MW570511                       | INMI_PtCUOW         | Italy          |
| MW570512                       | INMI_PtDAMP         | Italy          |
| MW570513                       | INMI_PtFEDQ         | Italy          |
| MW570514                       | INMI_PtGALW         | Italy          |
| MW570515                       | INMI_PtLANR         | Italy          |
| MW570516                       | INMI_PtMAZZ         | Italy          |
| MW570517                       | INMI_PtMORK         | Italy          |
| MW570518                       | INMI_PtNARY         | Italy          |
| MW570519                       | INMI_PtPRIH         | Italy          |
